# Supplementary material
Source: PubMed Central journal article supplement (PMC8851226)
Supplement: Supp_FigS1.pdf [file Supp_FigS1.pdf]

## Supplementary Data

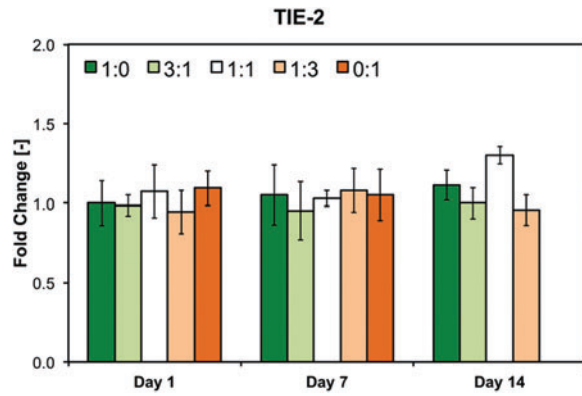

**SUPPLEMENTARY FIG. S1.** Expression of TIE-2 gene in bioprinted human cocultures. HUVECs and hMSCs were cocultured in five different ratios (1:0, 3:1, 1:1, 1:3, and 0:1) and analyzed after 1, 7, and 14 days for the expression of TIE-2 gene using RT-PCR. Data are reported as mean  $\pm$  standard deviation ( $n=4$ ). hMSC, human mesenchymal stem cell; HUVEC, human umbilical vein endothelial cell; RT-PCR, reverse transcriptase–polymerase chain reaction.
