# Supplementary material
Source: PubMed Central journal article supplement (PMC8851226)
Supplement: Supp_FigS2.pdf [file Supp_FigS2.pdf]

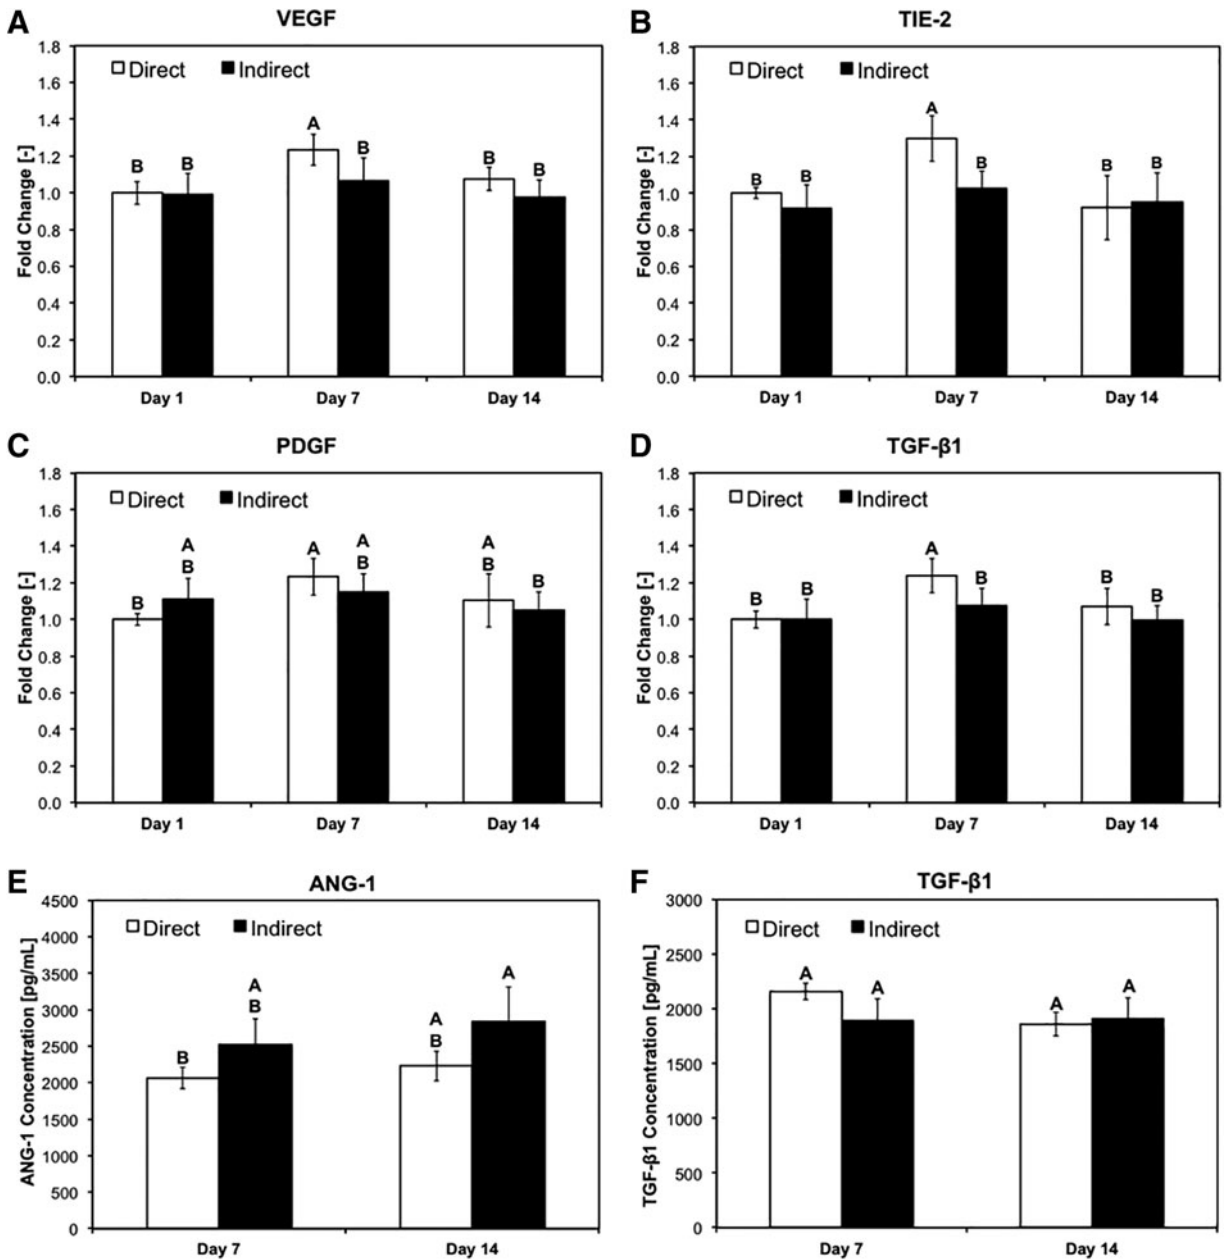

**SUPPLEMENTARY FIG. S2.** Expression of angiogenic/arteriogenic genes and factors in direct vs. indirect bioprinted cocultures. HUVECs and hMSCs were mixed in a 3:1 ratio and either homogeneously encapsulated in the GelMA bioink (Direct coculture) or singularly encapsulated in GelMA bioink and bioprinted adjacently (Indirect coculture). Scaffolds were evaluated for regulation of key angiogenic/arteriogenic pathways both through RT-PCR (A–D) and through ELISA (E, F). Data are reported as mean ± standard deviation ( $n=4$ ), and levels not connected by the *same letter* within each factor/time point (or gene/time point) tested are statistically different ( $p<0.05$ ). ELISA, enzyme-linked immunosorbent assay; GelMA, gelatin methacrylate.
