# Supplementary material
Source: PubMed Central journal article supplement (PMC8851226)
Supplement: Supp_FigS3-TableS1.pdf [file Supp_FigS3-TableS1.pdf]

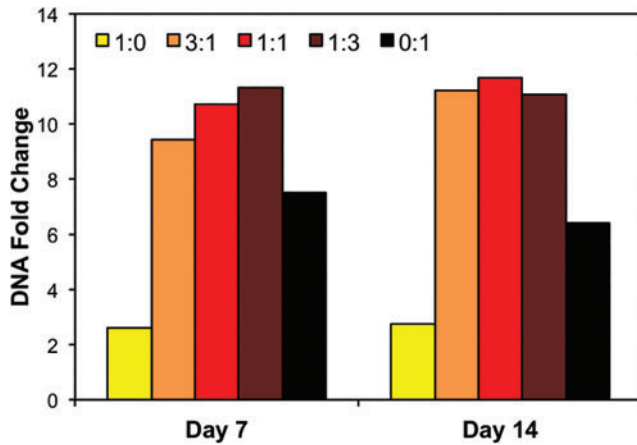

**SUPPLEMENTARY FIG. S3.** DNA fold change in bio-printed hybrid cocultures. HUVECs and rMSCs were cocultured in five different ratios (1:0, 3:1, 1:1, 1:3, and 0:1) and analyzed after 1, 7, and 14 days for cell growth. In each time point, data are reported normalized to the corresponding group at day 1. rMSC, rat mesenchymal stem cell.

**SUPPLEMENTARY TABLE S1. LIST OF GENE PROBES USED FOR QRT-PCR. RAT (OR HUMAN) PROBES WERE TESTED FOR LACK OF CROSS-REACTIVITY WITH HUMAN (OR RAT) CDNA DURING TESTING OF HYBRID COCULTURES (DATA NOT SHOWN)**

| <i>Gene</i>                               | <i>Assay ID (Thermo Fisher Scientific)</i> | <i>Reactivity</i> |
|-------------------------------------------|--------------------------------------------|-------------------|
| Vascular endothelial growth factor-A      | Rn01511601_m1                              | Rat               |
| Vascular endothelial growth factor-A      | Hs00900055_m1                              | Human             |
| Platelet-derived growth factor, subunit B | Rn01502596_m1                              | Rat               |
| Platelet-derived growth factor, subunit B | Hs00966522_m1                              | Human             |
| Transforming growth factor- $\beta$ 1     | Rn00572010_m1                              | Rat               |
| Transforming growth factor- $\beta$ 1     | Hs00998133_m1                              | Human             |
| TEK receptor tyrosine kinase, Tie-2       | Hs00945150_m1                              | Human             |
| Glyceraldehyde-3-phosphate dehydrogenase  | Rn01775763_g1                              | Rat               |
| Glyceraldehyde-3-phosphate dehydrogenase  | Hs03929097_g1                              | Human             |

cdNA, complementary DNA; qRT-PCR, quantitative reverse transcription-polymerase chain reaction.
